# Supplementary material for: Sequestration of tetravalent neptunium from acidic feeds using diglycolamide-functionalized dendrimers in a room temperature ionic liquid: extraction, spectroscopic and electrochemical studies
Source: Royal Society of Chemistry journal article supplement (doi:10.1039/d1nj03098a), 2021-01-01
Supplement: d1nj03098a1.pdf [file d1nj03098a1.pdf]

**Sequestration of tetravalent neptunium from acidic feeds using diglycolamide-functionalized dendrimers in a room temperature ionic liquid: extraction, spectroscopic and electrochemical studies**

Parveen K. Verma,<sup>a</sup> Rajesh B. Gujar,<sup>a</sup> B. Mahanty,<sup>a</sup> Andrea Leoncini,<sup>b</sup> Jurriaan Huskens,<sup>b</sup> Willem Verboom<sup>b</sup> and Prasanta K. Mohapatra<sup>a,\*</sup>

**ELECTRONIC SUPPORTING INFORMATION**

### S1. Np(IV) valency adjustment by ferrous sulphamate

A solution of ferrous sulfamate (FS) solution was freshly prepared by dissolving a known amount of iron powder (BDH) in sulfamic acid (Aldrich). For the conversion of Np to the Np(IV) state, a few drops of hydroxylamine nitrate (HAN) (1 M) as the reductant were added followed by the freshly prepared ferrous sulfamate. In case of  $^{239}\text{Np}$  tracers, the oxidation state of the resultant solution was confirmed by a TTA variation experiment at 1 M  $\text{HNO}_3$ , which resulted in a slope value of ca. 4 in the fitted  $\log D$  vs  $\log [\text{TTA}]$  concentration plot. A direct spectroscopic investigation was preferred for  $^{237}\text{Np}$  oxidation state confirmation after the addition of the reducing (FS+HAN) agents. The presence of peaks at 964 nm and 723 nm confirms the presence of Np(IV) with subsequent disappearance of the peak at 980 nm for Np(V) (Fig. S1).

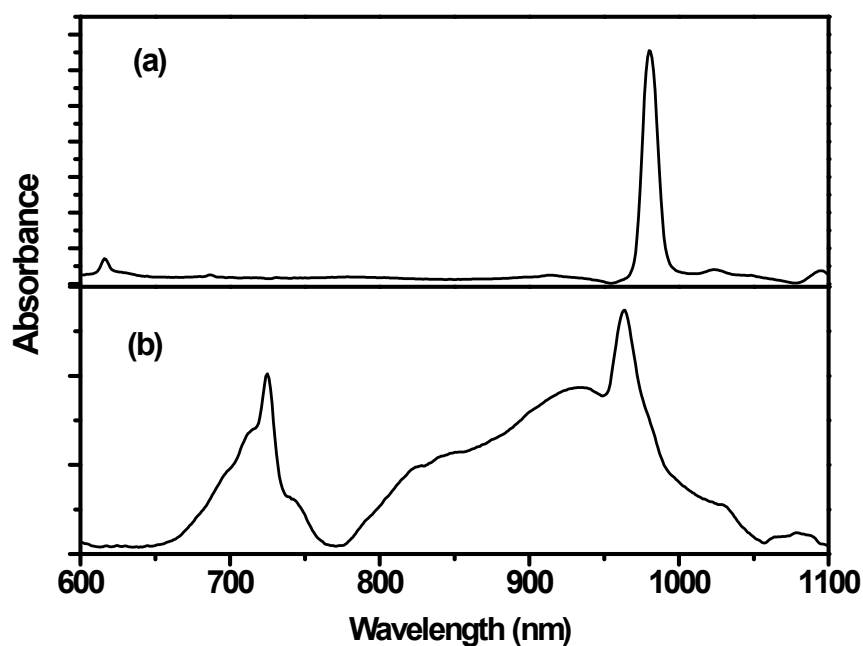

**Fig. S1.** UV-Vis spectrum of Np **a)** before and **b)** after the addition of ferrous sulphamate and hydroxylamine; T: 298 K.

## S2. Kinetics of the extraction

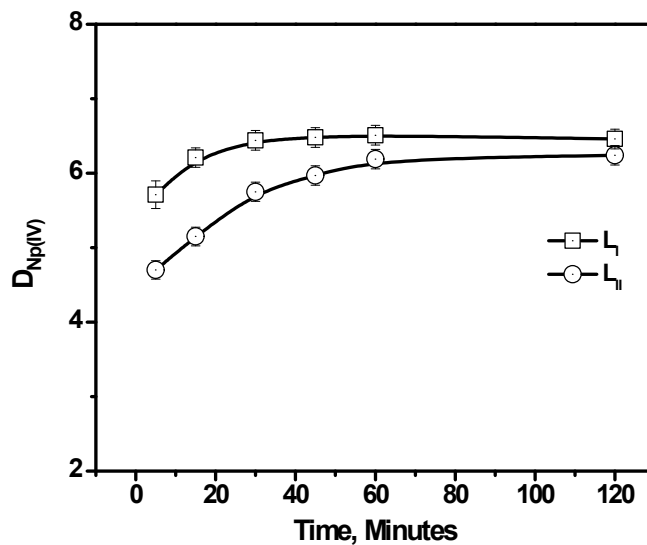

**Fig. S2.** Plot of the  $D_{Np}$  vs time for the extraction of Np(IV) with  $L_I$  or  $L_{II}$  dissolved in  $C_4mim.NTf_2$  for 3 M  $HNO_3$  at 298 K. (steady state reached in 45-46 minutes)

### Extraction equilibrium and distribution ratio correction

The extraction equilibrium constant ( $K_{ex}$ ) for the cation-exchange mechanism (equation 1) can be given by equation 2

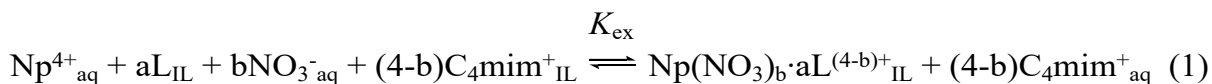

where the subscripts, 'aq' and 'IL' refer to the species present in the aqueous and the ionic liquid phases, respectively.

$$K_{ex} = \frac{[Np(NO_3)_b \cdot aL^{(4-b)+}]_{IL}}{[Np^{4+}]_{aq}[NO_3^{-}]^b_{aq}[L]^{a}_{IL} \cdot \gamma(Np^{4+})_{aq} \cdot \gamma(NO_3^{-})^b_{aq} \cdot \gamma(L)^a_{IL}} \quad (2)$$

where,  $K_{ex}$  is the two phase extraction constant, square bracket represent concentration of each species,  $\gamma$  is the activity coefficient for the given species, as indicated. The activity coefficient for  $L_{IL}$  and  $Np_{(aq)}^{4+}$  can be assumed to unity because of their very low concentration (i.e.,  $[L_{IL}] \leq 10^{-4}$  M and  $Np_{(aq)}^{4+} < 10^{-12}$  M) and the equation 2 can be reduced to equation 3 under the above assumptions

$$K'_{ex} = \frac{[Np(NO_3)_b \cdot aL^{(4-b)+}]_{IL}}{[Np^{4+}]_{aq}[NO_3^{-}]^b_{aq}[L]^{a}_{IL} \cdot \gamma(NO_3^{-})^b_{aq}} \quad (3)$$

where,  $K'_{ex}$  is conditional two-phase extraction constant. Since, the  $Np^{4+}$  extraction is taking place from the  $NO_3^-$  media, one has to take care for the  $NO_3^-$  complexation with  $Np^{4+}$  in the aqueous feed.<sup>1,2</sup> The various species of the  $Np^{4+}$  such as  $Np(NO_3)^{3+}$ ,  $Np(NO_3)_2^{2+}$ ,  $Np(NO_3)_3^+$ ,  $Np(NO_3)_4$  etc, can be present in the aqueous phase and the total concentration of  $Np_{aq}^{4+}$  can be given by equation 4.

$$[Np^{4+}]_{aq} = [Np^{4+}] \left[ 1 + \sum_i^n \beta_b [NO_3^-]^b \right] \quad (4)$$

Where,  $\beta_b$  for the complex  $Np(NO_3)_b^{(4-b)+}$  by equation 5

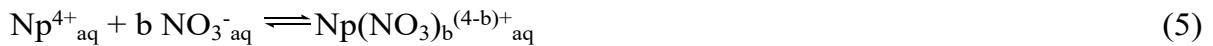

Equation (6) can be easily derived by combining equation (3) and (4),

$$K'_{ex} = \frac{[Np(NO_3)_b]_{org} [L_{IL}]^{(4-b)+}}{[Np^{4+}] \left( 1 + \sum_i^n \beta_b [NO_3^-]^b \right) [NO_3^-]_{(aq)}^b [L_{IL}]^a \cdot \gamma_{NO_3^-}^{(aq) b}} \dots 6$$

The  $D_{Np^{4+}}(exp)$  is the experimental distribution ratio of the  $Np^{4+}$  in the biphasic system (equation (7)). Hence, nitrate complexation corrected distribution ratio  $D_{Np^{4+}}(corr)$  is given of equation 8 as also suggested by others<sup>1,2</sup>

$$D_{Np^{4+}}(exp) = \frac{[Np(NO_3)_b]_{org} [L_{IL}]^{(4-b)+}}{[Np^{4+}] \left( 1 + \sum_i^n \beta_b [NO_3^-]^b \right)} \dots 7$$

$$D_{Np^{4+}}(corr) = D_{Np^{4+}}(exp) \cdot \left( 1 + \sum_i^n \beta_b [NO_3^-]^b \right) \dots 8$$

On combining equation 6,7, 8 and taking log on both sides gives equation 9

$$\log D_{Np^{4+}}(corr) = \log K'_{ex} + a \cdot \log [L_{(org)}] + b \cdot \log a_{[NO_3^-]_{(aq)}} \dots 9$$

The equation 9 gives the linear dependence of  $\log (D_{\text{Np}^{4+}}(\text{corr}))$  with the activity of nitrate ( $a[\text{NO}_3^-]_{(\text{aq})}$ ) and ligand concentration at a given temperature. The stoichiometry of the extracted complex in the organic phase can be found out if the value of ‘a’ and ‘b’ are known from the equation (9). The value of ‘a’ and ‘b’ can be easily determined by evaluating the  $D_{\text{Np}^{4+}}$  with varying ligand and nitrate concentration, respectively, and keeping other variables constant. The  $\log \beta$  value ( $\log \beta_1: 0.34$  ;  $\log \beta_2: 0.08$  ; and  $\log \beta_3: -0.26$  )<sup>3</sup> for the  $\text{Np}^{4+}$  nitrate complexation were used for the estimation of  $D_{\text{Np}^{4+}}(\text{corr})$  using experimental  $D_{\text{Np}}$  and the activity coefficient for nitrate ions were taken from ref.<sup>4</sup> The resulting  $\log D_{\text{Np}}(\text{corr})$  vs  $\log a(\text{NO}_3^-)$  plot shows nitrate dependence of  $\sim 3$  for the extraction of  $\text{Np}^{4+}$  by both  $L_{\text{I}}$  and  $L_{\text{II}}$  dissolved in the  $\text{C}_4\text{mim.NTf}_2$ .

### S3. Cyclic Voltammetric studies

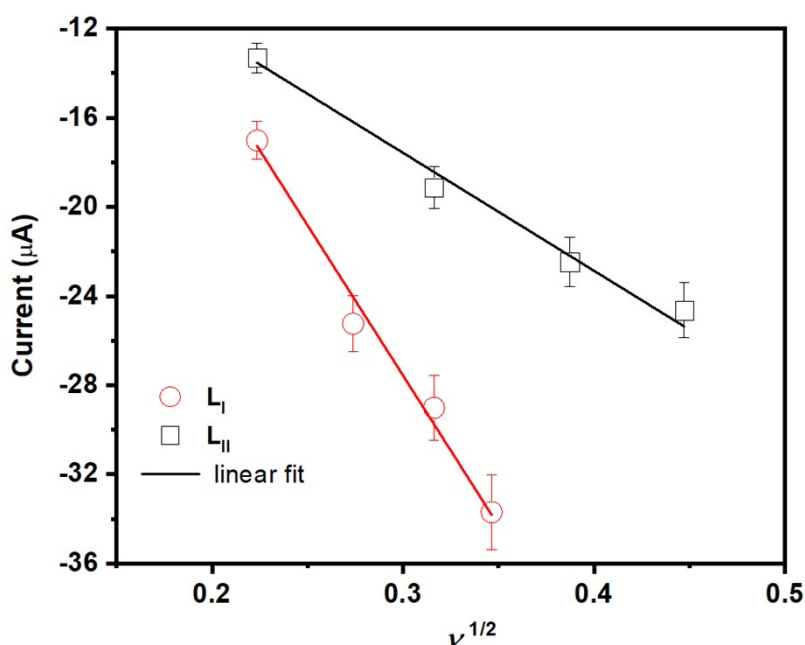

**Fig. S3.** Linear relationship of the current vs  $v^{1/2}$  for the CV studies of the extracted  $\text{Np}(\text{IV})$  complex with a)  $L_{\text{I}}$  and b)  $L_{\text{II}}$  dissolved in  $\text{C}_4\text{mim.NTf}_2$  at different scan rates at 298 K.

### References

- 1 J. N. Mathur and K. L. Nash, *Solvent Extr. Ion Exch.*, 1998, **16**, 1341–1356.
- 2 G. Suresh, M. S. Murali and J. N. Mathur, *Solvent Extr. Ion Exch.*, 2001, **19**, 947–964.
- 3 G. Burney and R. Harbour, *Radiochemistry of Neptunium*, Technical Information Center, Office of Information Services UNITED STATES ATOMIC ENERGY COMMISSION, NAS-NS-3060, 1974.
- 4 M. D. M. Marcos-Arroyo, M. K. Khoshkbarchi and J. H. Vera, *J. Solution Chem.*,

1996, **25**, 983–1000.
